# Supplementary material for: Synthesis of high-purity CuO nanoleaves and analysis of their ethanol gas sensing properties
Source: Royal Society of Chemistry journal article supplement (doi:10.1039/c5ra03497c), 2015-01-01
Supplement: c5ra03497c1.pdf [file c5ra03497c1.pdf]

## Supporting information

### Synthesis of high-purity CuO nanoleaves and analysis of their ethanol gas sensing property

Yu Cao<sup>a,†</sup>, Shiyu Liu<sup>a,†</sup>, Xian Jian<sup>a,†,\*</sup>, Gaolong Zhu<sup>a</sup>, Liangjun Yin<sup>a,\*</sup>, Le Zhang<sup>a</sup>, Biao Wu<sup>a</sup>, Yufeng Wei<sup>a</sup>, Tong Chen<sup>a</sup>, Yuqi Gao<sup>a</sup>, Hui Tang<sup>a,\*</sup>, Chao Wang<sup>b,\*</sup>, Weidong He<sup>a</sup> and Wanli Zhang<sup>c,\*</sup>

<sup>a</sup>Clean Energy Materials and Engineering Center, School of Energy Science and Engineering, State key Laboratory of Electronic Thin Films and Integrated Devices, Center for Information in Biomedicine, University of Electronic Science and Technology of China, Chengdu, 611731, China

<sup>b</sup>Key Laboratory of Advanced Technologies of Materials (Ministry of Education), School of Materials Science and Engineering, Southwest Jiaotong University, Chengdu 610031, People's Republic of China

<sup>c</sup>State key Laboratory of Electronic Thin Films and Integrated Devices, Institute of Microelectronic & solid-state electronics, University of Electronic Science and Technology of China, Chengdu, 610054, China.

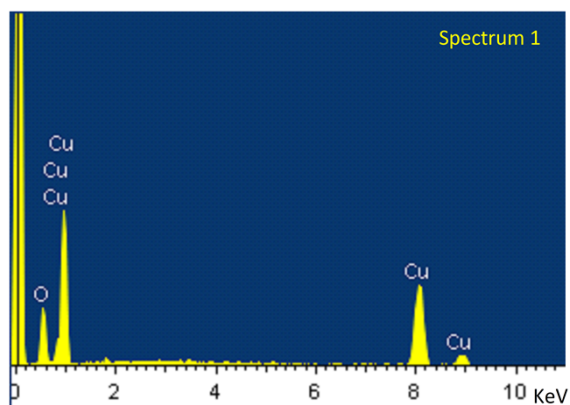

**Figure S1** EDX spectrum of as-prepared high-purity CuO nanoleaves.

**Table S1** The mass ratio and atomic ratio result of EDX characterization of as-prepared high purity CuO nanoleaves.

| Element | Mass ratio | Atomic ratio |
|---------|------------|--------------|
| O K     | 23.63%     | 55.13%       |
| Cu K    | 76.37%     | 44.87%       |

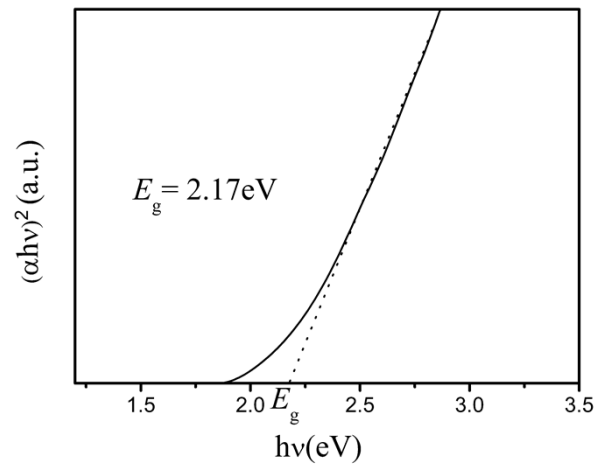

**Figure S2** Plots of  $(\alpha E_{\text{photo}})^2$  versus  $E_{\text{photo}}$  for high purity CuO nanoleaves and the value of its band gap.
